# Supplementary material
Source: publisher figshare collection journal article supplement (https://acs.figshare.com/ndownloader/files/4681867)
Supplement: Supplementary file 1 [file 4681867]

Archive with 29 entries (26 files):
- Supplementary Materials/Analysis.pdf
- Supplementary Materials/Minimum Energy Structures/
- Supplementary Materials/Minimum Energy Structures/README.txt
- Supplementary Materials/Minimum Energy Structures/silsesquioxane.xyz
- Supplementary Materials/Minimum Energy Structures/species1'.xyz
- Supplementary Materials/Minimum Energy Structures/species1.xyz
- Supplementary Materials/Minimum Energy Structures/species2'.xyz
- Supplementary Materials/Minimum Energy Structures/species2.xyz
- Supplementary Materials/Minimum Energy Structures/species3.xyz
- Supplementary Materials/Minimum Energy Structures/species4.xyz
- Supplementary Materials/Minimum Energy Structures/species5'.xyz
- Supplementary Materials/Minimum Energy Structures/species5.xyz
- Supplementary Materials/Minimum Energy Structures/species6.xyz
- Supplementary Materials/Minimum Energy Structures/species7.xyz
- Supplementary Materials/Minimum Energy Structures/species8.xyz
- Supplementary Materials/Minimum Energy Structures/species9.xyz
- Supplementary Materials/Minimum Energy Structures/v=o+2MeOH.xyz
- Supplementary Materials/Minimum Energy Structures/v=o+si-och3.xyz
- Supplementary Materials/Minimum Energy Structures/v_peroxide.xyz
- Supplementary Materials/README.txt
- Supplementary Materials/Transition State Structures/
- Supplementary Materials/Transition State Structures/README.txt
- Supplementary Materials/Transition State Structures/ts_2'_3.xyz
- Supplementary Materials/Transition State Structures/ts_4_5.xyz
- Supplementary Materials/Transition State Structures/ts_6_7.xyz
- Supplementary Materials/Transition State Structures/ts_7_8.xyz
- Supplementary Materials/Transition State Structures/ts_8_9.xyz
- Supplementary Materials/Transition State Structures/ts_9_1'.xyz
- Supplementary Materials/
