# Supplementary material
Source: publisher figshare collection journal article supplement (https://acs.figshare.com/ndownloader/files/4681867)
Supplement: Supplementary file 1 [file 4681867 › Supplementary Materials/Minimum Energy Structures/README.txt]

This directory contains the following xyz files for the minimum energy structures:


       Filename          :       Description

(1)  silsesquioxane.xyz     SiO2 silsesquioxane cube
(2)  species1.xyz           VOx/SiO2 silsesquioxane cube, shown in Figure 1
(3)  species1'.xyz          SiO2 silsesquioxane cube with 2 V=O units, shown in Figure 6
(4)  species2.xyz           O=V-OCH3, Si-OH species, shown in Figures 2 and 3
(5)  species2'.xyz          H3CO-V=O, Si-OH species, shown in Figures 2, 3, 4, and 5
(6)  species3.xyz           H2CO-V-OH, Si-OH species, shown in Figure 5
(7)  species4.xyz           V-OH, Si-OH species, shown in Figure 5
(8)  species5.xyz           V(3+), reduced vanadium center, shown in Figure 5
(9)  species5'.xyz          2 V(3+) reduced vanadium centers, shown in Figure 6
(10) species6.xyz           V-O2 peroxide species with 2 V atoms, shown in Figure 6
(11) species7.xyz           O=V-O-O-Si reoxidation species, shown in Figure 6
(12) species8.xyz           O=V-O-Si-O-O-Si reoxidation species, shown in Figure 6
(13) species9.xyz           O=V-O-Si-O-Si-O-O-V reoxidation species, shown in Figure 6
(14) v_peroxide.xyz         V-O2 peroxide species with 1 V atom
(15) v=o+2MeOH.xyz          VOx/SiO2 species with 2 adsorbed MeOH species, H3O-V-OCH3, 2 x Si-OH, shown in Figure 3
(16) v=o+si-och3.xyz        O=V, Si-OCH3, MeOH adsorbed onto Si, shown in Figure 4


These xyz files can be visualized with software such as ViewerPro or Molden.
They can also be read or edited with text editors such as Emacs or Notepad.
