# Supplementary material
Source: publisher figshare collection journal article supplement (https://acs.figshare.com/ndownloader/files/4681867)
Supplement: Supplementary file 1 [file 4681867 › Supplementary Materials/Minimum Energy Structures/silsesquioxane.xyz]

   28
scf done: -3224.626754
Si     3.536671     4.740182     4.497379
Si     2.316458     4.359147     1.608040
Si     1.018100     1.621145     2.516189
Si     2.238587     2.001757     5.405678
Si     0.925464     6.277429     5.398008
Si    -0.295031     5.896816     2.508510
Si    -1.593116     3.158404     3.416815
Si    -0.372901     3.539432     6.306154
 O     3.324067     4.675398     2.868232
 O     1.809511     2.797102     1.683474
 O     1.759119     1.374737     3.963177
 O     3.272579     3.253652     5.147955
 O     2.486348     5.823971     5.149941
 O     1.017514     5.364695     1.673641
 O    -0.542783     2.074617     2.764263
 O     0.926029     2.533872     6.240543
 O    -1.329035     4.644932     2.766223
 O    -1.380521     3.223208     5.045962
 O     0.134061     5.101472     6.230732
 H     4.909070     5.160329     4.789897
 H     3.033572     4.575421     0.349253
 H     1.043728     0.378068     1.741856
 H     2.918850     0.963088     6.182787
 H     0.899821     7.520514     6.172328
 H    -2.965512     2.738243     3.124296
 H    -1.090016     3.323153     7.564940
 O     0.184450     6.523815     3.951012
 H    -0.975286     6.935501     1.731415
