# Supplementary material
Source: publisher figshare collection journal article supplement (https://acs.figshare.com/ndownloader/files/4681867)
Supplement: Supplementary file 1 [file 4681867 › Supplementary Materials/Minimum Energy Structures/species1'.xyz]

28
scf done: -2937.558281
    Si      -2.48263     -0.986701     -0.802784 
    Si      -1.35176       1.90333      -1.52532 
     V     -0.422398        2.2832       1.58557 
    Si      -1.52778     -0.732614        2.2155 
     V      0.420319      -2.28303      -1.58736 
    Si       1.52375      0.733573       -2.2182 
    Si        2.4831      0.981814      0.806772 
    Si       1.35699      -1.90003       1.52528 
     O      -2.24961       0.53898      -1.36166 
     O      -1.09717       2.56124    -0.0210255 
     O      -1.22098      0.896324       2.32843 
     O      -2.36933      -1.01886      0.835022 
     O      -1.31088      -1.97715      -1.44008 
     O      0.101806       1.55392      -2.20345 
     O       1.30726       1.96386       1.44954 
     O    -0.0977576      -1.53785       2.19318 
     O       2.35623       1.00541     -0.829779 
     O       2.27008     -0.543525       1.37604 
     O       1.10816      -2.54745     0.0156002 
     H       -3.8043      -1.46493      -1.21269 
     H      -2.06737       2.86562      -2.36528 
     H      -2.31822      -1.16374       3.37007 
     O      0.654439      -3.56094      -2.47708 
     H        3.8036       1.47357       1.20433 
     H         2.057      -2.87308       2.36593 
     O       1.20147     -0.891697         -2.34 
     H       2.32672       1.16144      -3.36527 
     O     -0.650706       3.55932       2.47871 
