# Supplementary material
Source: publisher figshare collection journal article supplement (https://acs.figshare.com/ndownloader/files/4681867)
Supplement: Supplementary file 1 [file 4681867 › Supplementary Materials/Minimum Energy Structures/species1.xyz]

28
scf  0.000000
Si  3.5407  4.7312  4.4969
Si  2.3454  4.4012  1.5745
V  1.0188  1.5530  2.4686
Si  2.2663  1.9937  5.4646
Si  0.9301  6.2700  5.3928
Si -0.2952  5.8948  2.5040
Si -1.6553  3.1812  3.4280
Si -0.3752  3.5314  6.3047
O  3.3209  4.6562  2.8690
O  1.8687  2.8084  1.5660
O  1.8155  1.3012  4.0221
O  3.2789  3.2479  5.1572
O  2.4913  5.8168  5.1454
O  1.0121  5.3533  1.6660
O -0.6524  2.0496  2.7367
O  0.9202  2.5203  6.2417
O -1.3354  4.6480  2.7653
O -1.3855  3.2121  5.0466
O  0.1384  5.0894  6.2183
H  4.9144  5.1508  4.7809
H  3.0772  4.6940  0.3400
O  1.0413  0.2104  1.6449
H  2.9530  0.9965  6.2889
H  0.9022  7.5105  6.1702
H -3.0499  2.8166  3.1687
H -1.0918  3.3212  7.5640
O  0.1922  6.5178  3.9444
H -0.9719  6.9346  1.7266
