# Supplementary material
Source: publisher figshare collection journal article supplement (https://acs.figshare.com/ndownloader/files/4681867)
Supplement: Supplementary file 1 [file 4681867 › Supplementary Materials/Minimum Energy Structures/species2'.xyz]

   34
scf done: -3196.825922
 C     2.176272    -1.051223     0.772916
Si     3.533817     5.189684     4.594734
Si     2.406265     4.596772     1.694452
 V     2.150145     1.426870     2.311686
Si     2.702140     2.247239     5.403563
Si     0.731827     6.257931     5.488233
Si    -0.489926     5.627502     2.649297
Si    -2.245339     3.202386     3.795751
Si    -0.196608     3.334679     6.255712
 O     3.316836     5.096559     2.965671
 O     2.589443     2.950643     1.534021
 O     2.807500     1.442669     3.950429
 O     3.484842     3.682778     5.256606
 O     2.358199     6.126125     5.258180
 O     0.828795     4.930063     1.951332
 O    -2.189168     1.822518     2.922119
 O     1.127112     2.485565     5.763881
 O    -1.597772     4.478082     2.968606
 O    -1.424376     3.058863     5.222957
 O     0.181696     4.936152     6.294433
 H     4.841101     5.790401     4.869793
 H     2.891355     5.232234     0.464317
 O     0.564201     1.295318     2.373369
 H     3.364810     1.431909     6.427530
 H     0.464927     7.460179     6.281931
 H    -3.657581     3.480167     4.080851
 H    -0.579393     2.906361     7.605390
 O    -0.022032     6.386703     4.033328
 H    -1.058960     6.622734     1.734360
 O     2.766051     0.073403     1.410728
 H     2.451537    -1.031572    -0.286777
 H     2.573247    -1.960351     1.236687
 H     1.085813    -1.025725     0.875533
 H    -1.301376     1.514983     2.658779
