# Supplementary material
Source: publisher figshare collection journal article supplement (https://acs.figshare.com/ndownloader/files/4681867)
Supplement: Supplementary file 1 [file 4681867 › Supplementary Materials/Minimum Energy Structures/species2.xyz]

   34
scf done: -3196.825020
Si     3.418120     4.563753     4.606823
Si     2.590979     4.430931     1.520796
 V     1.002789     0.755808     3.369710
Si     2.193035     2.070044     6.094075
Si     0.899864     6.315797     5.209967
Si    -0.220013     5.698572     2.312617
Si    -1.394960     3.038886     3.450324
Si    -0.517366     3.718803     6.367219
 O     3.019728     4.107391     3.085596
 O     2.631193     3.041970     0.658673
 O     1.949746     1.006214     4.841815
 O     3.190663     3.278246     5.608683
 O     2.463923     5.819336     5.081308
 O     1.095748     5.129423     1.528339
 O    -0.019971     2.160214     3.098768
 O     0.738572     2.675757     6.558652
 O    -1.265637     4.465170     2.657706
 O    -1.436503     3.254769     5.078144
 O     0.053835     5.236612     6.118510
 H     4.821670     4.980805     4.697853
 H     3.528274     5.377630     0.899229
 O     0.136004    -0.554942     3.529878
 H     2.811061     1.353379     7.213510
 H     0.865612     7.627132     5.862090
 H    -2.604915     2.335209     3.014666
 H    -1.352162     3.696421     7.570330
 O     0.227437     6.432142     3.716842
 H    -0.924376     6.666752     1.467673
 O     2.042337     0.537153     1.961053
 C     2.268518    -0.577844     1.099223
 H     2.431207     2.208237     1.125713
 H     2.112144    -0.252226     0.065787
 H     1.580165    -1.393034     1.343502
 H     3.303577    -0.911210     1.225730
