# Supplementary material
Source: publisher figshare collection journal article supplement (https://acs.figshare.com/ndownloader/files/4681867)
Supplement: Supplementary file 1 [file 4681867 › Supplementary Materials/Minimum Energy Structures/species3.xyz]

   34
scf done: -3196.756301
Si     3.448551     4.356136     4.122042
Si     1.970520     4.360897     1.320629
 V     1.077257     1.272239     1.882513
Si     1.823504     1.875099     5.092104
Si     1.181471     6.210234     5.375146
Si    -0.467851     5.875937     2.716207
Si    -2.128426     3.453048     4.019046
Si    -0.268699     3.708484     6.575264
 O     3.107204     4.330700     2.509982
 O     1.387746     2.826426     1.078684
 O     0.950234     1.684463     3.717057
 O     3.089858     2.900681     4.796769
 O     2.594148     5.553276     4.849684
 O     0.731861     5.353452     1.721083
 O    -1.741647     1.955440     3.440044
 O     0.824167     2.527556     6.230913
 O    -1.468515     4.633648     3.077552
 O    -1.554028     3.617181     5.556475
 O     0.448827     5.184716     6.429049
 H     4.883040     4.610742     4.289286
 H     2.591002     4.837108     0.078178
 O    -0.271888     0.163767     1.599175
 H     2.379743     0.626183     5.635209
 H     1.462159     7.477931     6.054491
 H    -3.588941     3.594035     4.007736
 H    -0.731854     3.544386     7.956017
 O     0.194976     6.492432     4.089753
 H    -1.213659     6.935761     2.030267
 O     2.617079     0.303113     1.854059
 H    -0.833289     1.697866     3.728919
 H    -1.165609     0.525427     1.772921
 C     3.838626     0.039796     1.755080
 H     4.163045    -0.997385     1.844867
 H     4.558889     0.839524     1.574299
