# Supplementary material
Source: publisher figshare collection journal article supplement (https://acs.figshare.com/ndownloader/files/4681867)
Supplement: Supplementary file 1 [file 4681867 › Supplementary Materials/Minimum Energy Structures/species4.xyz]

   30
scf done: -3082.226863
Si     3.560404     4.863101     4.503728
Si     2.431385     4.447295     1.653360
 V     0.793731     1.418895     2.296897
Si     2.274476     2.005150     5.271629
Si     0.917046     6.297135     5.389787
Si    -0.325691     5.790649     2.514021
Si    -1.761651     3.193543     3.519004
Si    -0.332576     3.550190     6.303416
 O     3.397170     5.006995     2.850506
 O     2.334528     2.763055     1.925178
 O     1.841106     1.272117     3.899120
 O     3.267031     3.304037     4.893784
 O     2.505777     5.883486     5.236517
 O     0.920795     5.046770     1.711900
 O    -0.794825     2.088536     2.783566
 O     0.985846     2.600871     6.113102
 O    -1.479233     4.685634     2.858482
 O    -1.446096     3.247795     5.133173
 O     0.116102     5.137287     6.224285
 H     4.929802     5.245481     4.857744
 H     3.025288     4.690454     0.337074
 O     0.931963     0.125957     1.097499
 H     3.039346     1.121379     6.162918
 H     0.825839     7.572361     6.104671
 H    -3.178113     2.865232     3.324673
 H    -0.939305     3.299711     7.613691
 O     0.265580     6.467814     3.886667
 H    -0.882949     6.836086     1.652213
 H     2.880903     2.487087     2.697903
 H     1.641920    -0.535103     1.056994
