# Supplementary material
Source: publisher figshare collection journal article supplement (https://acs.figshare.com/ndownloader/files/4681867)
Supplement: Supplementary file 1 [file 4681867 › Supplementary Materials/Minimum Energy Structures/species5'.xyz]

   26
scf done: -2786.990808
Si     3.632233     4.704278     4.477096
Si     2.365734     4.436524     1.561960
 V     1.020402     1.791270     2.621141
Si     2.284718     2.000146     5.500305
 V     0.914866     6.110261     5.288624
Si    -0.350657     5.900949     2.410414
Si    -1.698140     3.197279     3.433604
Si    -0.431473     3.463844     6.348407
 O     3.347895     4.669296     2.858763
 O     1.911061     2.836483     1.506839
 O     1.868683     1.248300     4.075196
 O     3.298006     3.250338     5.166294
 O     2.662106     5.865457     5.170137
 O     1.016380     5.366181     1.673559
 O    -0.726614     2.037992     2.739329
 O     0.916159     2.531650     6.236793
 O    -1.365828     4.652971     2.747168
 O    -1.414103     3.230409     5.052057
 O     0.025074     5.063407     6.402119
 H     5.041362     5.034786     4.711444
 H     3.094875     4.784534     0.338432
 H     2.968911     1.047477     6.380222
 H    -3.106804     2.865404     3.198384
 H    -1.160619     3.118118     7.572582
 O     0.066874     6.653689     3.834599
 H    -1.033779     6.853608     1.529657
