# Supplementary material
Source: publisher figshare collection journal article supplement (https://acs.figshare.com/ndownloader/files/4681867)
Supplement: Supplementary file 1 [file 4681867 › Supplementary Materials/Minimum Energy Structures/species5.xyz]

   27
scf done: -3005.809429
Si     3.540114     4.712345     4.487425
Si     2.362340     4.415543     1.546454
 V     1.017867     1.773153     2.607483
Si     2.287231     1.974049     5.485125
Si     0.929399     6.252847     5.381886
Si    -0.292089     5.878562     2.495091
Si    -1.692684     3.177752     3.429582
Si    -0.378685     3.517358     6.290040
 O     3.323234     4.642612     2.859020
 O     1.900176     2.817116     1.485961
 O     1.873232     1.227481     4.055879
 O     3.293785     3.230790     5.158243
 O     2.489711     5.795723     5.138706
 O     1.018232     5.353859     1.651121
 O    -0.729475     2.012300     2.732715
 O     0.918319     2.509968     6.217223
 O    -1.333658     4.634168     2.760437
 O    -1.412345     3.205474     5.048668
 O     0.130604     5.077261     6.207168
 H     4.912958     5.138794     4.768869
 H     3.105661     4.758343     0.330020
 H     2.969633     1.016715     6.361346
 H     0.905245     7.493316     6.160269
 H    -3.103047     2.860398     3.184727
 H    -1.081677     3.302158     7.557025
 O     0.194520     6.507845     3.933482
 H    -0.974900     6.915768     1.718133
