# Supplementary material
Source: publisher figshare collection journal article supplement (https://acs.figshare.com/ndownloader/files/4681867)
Supplement: Supplementary file 1 [file 4681867 › Supplementary Materials/Minimum Energy Structures/species6.xyz]

28
scf done: -2937.384451
    Si       2.63246       1.05519      0.694154 
    Si        1.3448      0.715217      -2.21022 
     V      0.233426      -2.15961      -1.32198 
    Si       1.27346      -1.66594       1.67263 
     V    -0.0433686       2.44463       1.50356 
    Si      -1.38009       2.20678      -1.37419 
    Si      -2.53198      -0.43357     -0.313616 
    Si      -1.44883     -0.198028       2.55623 
     O       2.30309       1.02181     -0.916438 
     O        1.0673     -0.937701      -2.26419 
     O       1.02055      -2.45821      0.216521 
     O       2.26138     -0.390662       1.38399 
     O       1.71359       2.24165       1.40605 
     O    -0.0777766       1.51637       -2.1088 
     O      -1.10685      -1.14715     -0.727223 
     O     -0.157727      -1.18945       2.30597 
     O      -2.51129       1.07046     -0.994774 
     O      -2.54465     -0.343595       1.33488 
     O     -0.911093       1.37677       2.61346 
     H       4.05655       1.33834      0.893771 
     H       2.04149       1.08935      -3.44343 
     O     -0.937218      -3.32539      -2.05754 
     H       1.93157      -2.60733       2.58198 
     H      -3.72579      -1.15281     -0.767775 
     H      -2.09412     -0.548313       3.82489 
     O     -0.872525        2.9499      0.026387 
     H      -1.97842       3.19748      -2.27364 
     O      0.442059      -3.66617      -2.24068 
