# Supplementary material
Source: publisher figshare collection journal article supplement (https://acs.figshare.com/ndownloader/files/4681867)
Supplement: Supplementary file 1 [file 4681867 › Supplementary Materials/Minimum Energy Structures/species7.xyz]

28
scf done: -2937.382799
    Si       2.66346       1.04245      0.706264 
    Si       1.36007      0.576305      -2.19865 
     V      0.376971      -2.35806      -1.38012 
    Si       1.35943      -1.59385       1.77544 
     V    -0.0826347       2.44462       1.42468 
    Si      -1.35496       2.16162       -1.3997 
    Si      -2.65372     -0.463866     -0.409866 
    Si      -1.34487     -0.262896       2.51374 
     O       2.30494      0.855191     -0.882427 
     O       1.12273      -1.05972      -2.34487 
     O      0.774823       -2.0732       0.30519 
     O       2.42365     -0.366494       1.52668 
     O       1.66527       2.20833       1.35665 
     O    -0.0699511       1.36814      -2.02967 
     O      -1.64269      -1.17386      -1.58153 
     O      0.062246      -1.09898       2.66249 
     O      -2.52326       1.08878     -0.918204 
     O      -2.09977     -0.686699       1.10725 
     O      -1.01356       1.36437       2.47753 
     H       4.06229       1.45255      0.858695 
     H       2.04111       1.05754      -3.40448 
     O        -1.412       -2.6131      -1.50994 
     H       2.03554      -2.68425       2.48219 
     H      -4.02637     -0.964632     -0.514834 
     H      -2.21525     -0.572298       3.65184 
     O     -0.871771       3.01182     -0.055229 
     H      -1.93255       3.07666      -2.38849 
     O      0.990827      -3.73648       -1.8306 
