# Supplementary material
Source: publisher figshare collection journal article supplement (https://acs.figshare.com/ndownloader/files/4681867)
Supplement: Supplementary file 1 [file 4681867 › Supplementary Materials/Minimum Energy Structures/species8.xyz]

28
scf done: -2937.371237
    Si      -2.47574     -0.903296     -0.905765 
    Si      -1.27335       1.99654      -1.52837 
     V     -0.123057       2.40473       1.36601 
    Si      -1.37316     -0.183385       2.77135 
     V       0.32817      -2.17995      -1.55843 
    Si       1.56815      0.702202       -2.2752 
    Si       2.66133        1.0554      0.698507 
    Si       1.24172      -1.62353       1.63299 
     O      -2.19379      0.688826      -1.13979 
     O     -0.949109       2.84174     -0.137156 
     O     -0.991134       1.41662       2.54817 
     O      -2.63613     -0.601179       1.71711 
     O      -1.40919      -1.84656       -1.7586 
     O      0.139643       1.50729      -2.20388 
     O       1.63202       2.21855       1.29668 
     O    -0.0531724      -1.11381       2.50786 
     O        2.4689      0.974972      -0.93138 
     O       2.29863      -0.38702        1.3986 
     O       0.77095      -2.18033      0.140757 
     H      -2.00219       2.85216      -2.46916 
     H      -1.89379     -0.358288       4.13252 
     O      0.663019      -3.57036       -2.2171 
     H       4.04848       1.41097       1.00981 
     H       1.90546      -2.69895       2.37324 
     O        1.2599     -0.927921      -2.38464 
     H       2.31455       1.13098      -3.46037 
     O        -2.063      -1.42043      0.644155 
     H      -3.86412      -1.20599      -1.26793 
