# Supplementary material
Source: publisher figshare collection journal article supplement (https://acs.figshare.com/ndownloader/files/4681867)
Supplement: Supplementary file 1 [file 4681867 › Supplementary Materials/Minimum Energy Structures/species9.xyz]

28
scf done: -2937.386603
    Si      -2.51552     -0.939811     -0.818884 
    Si       -1.3108       1.93166      -1.55357 
     V     -0.213122       2.26121        1.4807 
    Si      -1.67494     -0.648471       2.18963 
     V      0.415433      -2.26486      -1.48573 
    Si       1.53002      0.703191      -2.28546 
    Si        2.6265       1.10863       0.68352 
    Si       1.34268      -1.64773       1.57496 
     O      -2.22531      0.571917      -1.36474 
     O       -1.0184       2.60015     -0.075952 
     O      -1.71586       1.07775       2.22772 
     O       -2.5285     -0.970423      0.837427 
     O      -1.31988      -1.96502      -1.33851 
     O      0.116509       1.53255      -2.27001 
     O       1.56044       2.21507       1.29656 
     O     -0.137889      -1.15818       2.11219 
     O       2.42439       1.00752     -0.946278 
     O       2.33265     -0.364769       1.36789 
     O       1.11991      -2.42813      0.127513 
     H      -3.81673      -1.40999      -1.29797 
     H      -2.03133        2.8752      -2.41317 
     H      -2.34901      -1.15842       3.38357 
     O      0.650166      -3.59654      -2.29287 
     H       4.00892       1.49925      0.975927 
     H       1.92668      -2.57291       2.54845 
     O       1.18404     -0.927562      -2.33054 
     H       2.29723        1.0611      -3.48077 
     O      -0.67827       1.60762        3.1484 
