# Supplementary material
Source: publisher figshare collection journal article supplement (https://acs.figshare.com/ndownloader/files/4681867)
Supplement: Supplementary file 1 [file 4681867 › Supplementary Materials/Minimum Energy Structures/v=o+2MeOH.xyz]

   40
scf done: -3312.554740
 O     0.635345    -1.501399     3.769934
 C     1.629117    -1.484990     4.798632
 H     2.473020    -2.102195     4.470863
 H     1.183480    -1.926981     5.695812
 H     1.981784    -0.473274     5.029776
Si     3.499472     5.465865     4.951094
Si     3.003965     3.860491     2.248750
 V     0.213411    -0.163340     2.717339
Si     2.732431     2.851128     6.514952
Si     0.509787     6.432600     4.914046
Si    -0.040735     4.844887     2.222328
Si    -1.392992     2.471157     3.815682
Si    -0.355657     3.829420     6.446042
 O     3.582323     4.823476     3.436375
 O     3.125480     2.303958     2.810617
 O     3.144816     1.628320     5.504182
 O     3.463815     4.265802     6.065800
 O     2.145334     6.394086     5.067155
 O     1.438498     4.209179     1.892486
 O    -0.261161     1.263191     3.648144
 O     1.103550     3.103977     6.516014
 O    -1.049840     3.648814     2.723492
 O    -1.302636     3.047378     5.346674
 O    -0.182860     5.402790     5.991640
 H     4.674798     6.311200     5.177540
 H     3.804337     4.060249     1.031116
 O    -0.940596    -0.668406     1.764635
 H     3.162831     2.490423     7.871252
 H     0.034760     7.794043     5.173617
 H    -2.744364     1.957444     3.566033
 H    -1.030677     3.783702     7.747105
 O     0.091001     5.997101     3.382557
 H    -0.595546     5.442731     1.004297
 O     1.604741     0.280896     1.686721
 C     1.868067    -0.015443     0.315466
 H     2.603719     1.601446     2.359052
 H     2.268037     0.883176    -0.166854
 H     0.949673    -0.325938    -0.192568
 H     2.611669    -0.817625     0.258965
 H     3.216914     1.850849     4.547654
