# Supplementary material
Source: publisher figshare collection journal article supplement (https://acs.figshare.com/ndownloader/files/4681867)
Supplement: Supplementary file 1 [file 4681867 › Supplementary Materials/Minimum Energy Structures/v=o+si-och3.xyz]

   34
scf done: -3196.818674
Si     3.462436     4.637301     4.583148
Si     2.642049     4.220017     1.561575
 V     1.279485     1.300722     2.082963
Si     2.259408     2.244686     6.303916
Si     0.883217     6.292555     5.190396
Si    -0.139199     5.595435     2.261238
Si    -1.303412     2.934410     3.404039
Si    -0.547408     3.709973     6.344226
 O     3.450048     4.595600     2.948065
 O     2.350895     2.599550     1.507619
 O     2.284693     0.714167     5.657424
 O     2.935604     3.180115     5.147594
 O     2.459635     5.814766     5.144280
 O     1.213080     5.035245     1.519967
 O     0.073502     2.052073     3.136821
 O     0.716478     2.692676     6.638094
 O    -1.173052     4.352002     2.582655
 O    -1.389697     3.207181     5.024654
 O     0.023228     5.231329     6.107107
 H     4.825024     4.911565     5.050407
 H     3.464938     4.620193     0.416411
 H     0.805485     7.624209     5.795162
 H    -2.511356     2.224773     2.972518
 H    -1.442026     3.695627     7.504485
 O     0.270017     6.339714     3.669893
 H    -0.815035     6.553962     1.384006
 C     1.648909    -0.406546     6.291234
 H     2.125509    -0.626256     7.253211
 H     1.766434    -1.265919     5.628247
 H     0.582474    -0.211940     6.444334
 O     0.619582     0.585519     0.840997
 O     2.146755     0.076854     2.987581
 H     2.380587     0.386791     3.902732
 H     3.036006     2.282629     7.555288
