# Supplementary material
Source: publisher figshare collection journal article supplement (https://acs.figshare.com/ndownloader/files/4681867)
Supplement: Supplementary file 1 [file 4681867 › Supplementary Materials/Minimum Energy Structures/v_peroxide.xyz]

   29
scf done: -3156.203231
Si     3.507644     4.757089     4.508873
Si     2.320821     4.370394     1.571888
 V     1.223478     1.510345     2.474435
Si     2.254187     1.985453     5.459014
Si     0.923089     6.258646     5.380684
Si    -0.350854     5.849832     2.492306
Si    -1.532512     3.227947     3.478859
Si    -0.420339     3.519944     6.289464
 O     3.243142     4.692737     2.887040
 O     2.067989     2.712283     1.515575
 O     2.026481     1.187409     4.000019
 O     3.214630     3.282292     5.176522
 O     2.513186     5.876590     5.184650
 O     0.887022     5.155510     1.651661
 O    -0.066789     2.569880     3.102731
 O     0.812093     2.443732     6.081535
 O    -1.526985     4.736274     2.808070
 O    -1.572796     3.307145     5.127668
 O     0.173094     5.049408     6.201676
 H     4.900966     5.131522     4.758121
 H     3.034447     4.749237     0.349757
 O    -0.008124     0.389025     1.766059
 H     2.922640     1.053198     6.370382
 H     0.822119     7.505234     6.142347
 H    -2.690451     2.473192     2.991354
 H    -1.031307     3.303468     7.602703
 O     0.224878     6.456300     3.906744
 H    -0.928627     6.931297     1.691407
 O     1.352976     0.000317     1.549458
