# Supplementary material
Source: publisher figshare collection journal article supplement (https://acs.figshare.com/ndownloader/files/4681867)
Supplement: Supplementary file 1 [file 4681867 › Supplementary Materials/README.txt]

This zip directory contains the following files and subdirectories:

(1) Analysis.pdf : PDF file with details of how rate constants and surface species concentrations were calculated

(2) Minimum Energy Structures : Sub-directory containing optimized geometries in xyz format

(3) Transition State Structures : Sub-directory containing transition state geometries in xyz format

See README.txt files within each subdirectory for more information.
