# Supplementary material
Source: publisher figshare collection journal article supplement (https://acs.figshare.com/ndownloader/files/4681867)
Supplement: Supplementary file 1 [file 4681867 › Supplementary Materials/Transition State Structures/README.txt]

This directory contains the following xyz files for the transition state structures:


       Filename   :     Description

(1)  ts_2'_3.xyz     TS for reaction step 2' to 3, H-transfer, rate-limiting step    
(2)  ts_4_5.xyz      TS for reaction step 4 to 5, desorption of H2O
(3)  ts_6_7.xyz      TS for reaction step 6 to 7, oxygen migration, reoxidation
(4)  ts_7_8.xyz      TS for reaction step 7 to 8, oxygen migration, reoxidation
(5)  ts_8_9.xyz      TS for reaction step 8 to 9, oxygen migration, reoxidation
(6)  ts_9_1'.xyz

These xyz files can be visualized with software such as ViewerPro or Molden.
They can also be read or edited with text editors such as Emacs or Notepad.
