# Supplementary material
Source: publisher figshare collection journal article supplement (https://acs.figshare.com/ndownloader/files/4681867)
Supplement: Supplementary file 1 [file 4681867 › Supplementary Materials/Transition State Structures/ts_2'_3.xyz]

   34
scf done: -3196.747577
Si     2.417555     1.882905     0.960888
Si     1.198442     1.286931    -1.881374
 V     0.927303    -1.879425    -0.881895
Si     1.714276    -0.990213     2.135763
Si    -0.420795     2.996950     1.870465
Si    -1.581626     2.560245    -1.042827
Si    -2.902018    -0.118367    -0.040371
Si    -1.185408     0.072322     2.588129
 O     2.216211     1.722086    -0.664980
 O     0.829573    -0.324448    -1.714946
 O     1.460469    -1.950954     0.801417
 O     2.459633     0.393430     1.657475
 O     1.183488     2.758575     1.593245
 O    -0.185465     2.154740    -1.821011
 O    -3.008329    -1.439471    -0.987546
 O     0.272552    -0.649713     2.842439
 O    -2.552823     1.252856    -0.895386
 O    -1.679930    -0.323861     1.071888
 O    -1.030561     1.709044     2.698872
 H     3.688050     2.565949     1.216459
 H     1.866830     1.511422    -3.167374
 O    -0.528117    -2.752782    -1.211073
 H     2.569133    -1.708368     3.085450
 H    -0.597423     4.207805     2.675851
 H    -4.193274     0.081087     0.635927
 H    -2.121809    -0.381034     3.622804
 O    -1.211958     3.169992     0.442803
 H    -2.262030     3.594190    -1.827546
 O     1.695462    -3.141585    -1.842469
 H    -2.192154    -1.960923    -1.140043
 H    -0.268292    -3.591498    -1.897047
 C     1.105832    -4.006332    -2.661553
 H     1.416363    -5.045936    -2.546224
 H     0.900860    -3.655598    -3.676207
