# Supplementary material
Source: publisher figshare collection journal article supplement (https://acs.figshare.com/ndownloader/files/4681867)
Supplement: Supplementary file 1 [file 4681867 › Supplementary Materials/Transition State Structures/ts_4_5.xyz]

   30
scf done: -3082.225889
Si    -1.418257    -0.158091     2.567388
Si     1.223383    -1.679417     1.588127
 V    -0.172470    -2.255107    -1.369050
Si    -2.809719    -0.692003    -0.189456
Si    -0.189465     2.557273     1.544651
Si     2.514924     1.121364     0.790973
Si     1.486029     0.668286    -2.125869
Si    -1.375961     1.876218    -1.311913
 O    -0.119922    -1.137958     2.369916
 O     0.850934    -2.361244     0.157091
 O    -1.832403    -1.877726    -0.749759
 O    -2.558471    -0.458291     1.425933
 O    -0.933182     1.416597     2.454976
 O     2.246688    -0.390576     1.346170
 O     1.413693    -1.038761    -2.101613
 O    -2.485808     0.728425    -0.983723
 O     2.436151     1.111433    -0.872667
 O    -0.046272     1.177563    -2.013563
 O    -0.885839     2.642046     0.054903
 H    -1.999737    -0.372306     3.895654
 H     1.924604    -2.628962     2.463014
 H    -4.227863    -1.011951    -0.394817
 H    -0.299250     3.862134     2.201339
 H     2.102934     1.097895    -3.384647
 H    -1.937667     2.856083    -2.245300
 O     1.406171     2.182994     1.367870
 H     3.859189     1.566770     1.167201
 H    -0.145940    -4.154921    -2.975872
 O    -0.273784    -3.200152    -2.872922
 H     2.247298    -1.447610    -1.804049
