# Supplementary material
Source: publisher figshare collection journal article supplement (https://acs.figshare.com/ndownloader/files/4681867)
Supplement: Supplementary file 1 [file 4681867 › Supplementary Materials/Transition State Structures/ts_6_7.xyz]

   28
FINAL HEAT OF FORMATION =    -0.306314
Si     2.654360     1.053730     0.702385
Si     1.361760     0.653402    -2.210810
 V     0.314121    -2.197970    -1.356410
Si     1.338530    -1.619530     1.758010
 V    -0.066404     2.447890     1.456630
Si    -1.370630     2.180150    -1.390320
Si    -2.593790    -0.467870    -0.391223
Si    -1.392380    -0.227012     2.548940
 O     2.305180     0.928527    -0.895928
 O     1.132970    -0.991145    -2.334830
 O     0.880374    -2.252370     0.293528
 O     2.365420    -0.371521     1.475170
 O     1.686530     2.225290     1.377700
 O    -0.071935     1.434530    -2.063790
 O    -1.354100    -1.217900    -1.226230
 O    -0.021140    -1.134240     2.536180
 O    -2.525370     1.084880    -0.947213
 O    -2.310470    -0.544959     1.222170
 O    -0.969154     1.382670     2.544800
 H     4.065070     1.408090     0.873579
 H     2.047990     1.082380    -3.428550
 O    -1.144390    -3.005880    -1.811060
 H     2.008590    -2.660450     2.539960
 H    -3.921350    -1.046480    -0.641015
 H    -2.169700    -0.557832     3.745920
 O    -0.872188     2.987750    -0.022154
 H    -1.951600     3.129810    -2.343590
 O     0.573679    -3.703950    -2.011840
