# Supplementary material
Source: publisher figshare collection journal article supplement (https://acs.figshare.com/ndownloader/files/4681867)
Supplement: Supplementary file 1 [file 4681867 › Supplementary Materials/Transition State Structures/ts_7_8.xyz]

   28
FINAL HEAT OF FORMATION =    -0.022326
Si    -2.628240    -0.684946    -0.800466
Si    -1.291110     2.100610    -1.479780
 V    -0.101621     2.422950     1.398240
Si    -1.379830    -0.227888     2.627150
 V     0.308297    -2.268140    -1.483080
Si     1.484620     0.640512    -2.243840
Si     2.664160     1.047410     0.703278
Si     1.298650    -1.617890     1.688990
 O    -2.379150     0.891336    -1.087910
 O    -0.921202     2.920860    -0.100791
 O    -0.998562     1.395430     2.517270
 O    -2.434970    -0.657261     1.379550
 O    -1.477100    -2.161010    -1.721730
 O     0.052079     1.443940    -2.136210
 O     1.647600     2.216550     1.323930
 O     0.004892    -1.110710     2.570920
 O     2.398450     0.929607    -0.913522
 O     2.355240    -0.375905     1.458740
 O     0.802474    -2.151120     0.210594
 H    -1.974610     2.958720    -2.441290
 H    -2.044710    -0.451348     3.924050
 O     0.805568    -3.652630    -2.057740
 H     4.057270     1.431170     0.944977
 H     1.965590    -2.693700     2.425190
 O     1.180310    -0.979688    -2.369030
 H     2.198420     1.102260    -3.438240
 O    -1.564770    -1.369880     0.068027
 H    -4.027760    -1.099260    -0.967290
