# Supplementary material
Source: publisher figshare collection journal article supplement (https://acs.figshare.com/ndownloader/files/4681867)
Supplement: Supplementary file 1 [file 4681867 › Supplementary Materials/Transition State Structures/ts_8_9.xyz]

   28
FINAL HEAT OF FORMATION =    -0.006393
Si    -2.493050    -0.924359    -0.803927
Si    -1.294860     1.963200    -1.542020
 V    -0.184913     2.305110     1.424110
Si    -1.485280    -0.469168     2.522040
 V     0.365390    -2.223990    -1.533170
Si     1.548270     0.703084    -2.282760
Si     2.643470     1.091530     0.687632
Si     1.340690    -1.653200     1.587930
 O    -2.215200     0.632968    -1.256930
 O    -0.984991     2.722840    -0.098773
 O    -2.261310     0.552098     1.723810
 O    -2.294760    -1.204770     0.858837
 O    -1.368620    -1.916150    -1.560010
 O     0.131179     1.523940    -2.236320
 O     1.587790     2.215200     1.301560
 O    -0.024035    -1.173340     2.335430
 O     2.445500     0.992450    -0.938794
 O     2.324070    -0.372896     1.383810
 O     0.946855    -2.315930     0.135829
 H    -3.839910    -1.307430    -1.284180
 H    -2.016710     2.868210    -2.441980
 H    -2.111760    -0.820344     3.814610
 O     0.659793    -3.590940    -2.260980
 H     4.028620     1.457150     0.993054
 H     1.936400    -2.649810     2.469990
 O     1.225690    -0.926317    -2.361420
 H     2.307040     1.096870    -3.471700
 O    -0.915360     1.424010     2.834310
