# Supplementary material
Source: publisher figshare collection journal article supplement (https://acs.figshare.com/ndownloader/files/4681867)
Supplement: Supplementary file 1 [file 4681867 › Supplementary Materials/Transition State Structures/ts_9_1'.xyz]

   28
FINAL HEAT OF FORMATION =    -0.069089
Si    -2.508630    -0.950112    -0.814619
Si    -1.322290     1.925080    -1.552000
 V    -0.223089     2.275950     1.434440
Si    -1.642350    -0.664889     2.202080
 V     0.416396    -2.269160    -1.508110
Si     1.529000     0.709547    -2.271220
Si     2.598350     1.080090     0.710196
Si     1.346720    -1.704240     1.563770
 O    -2.229490     0.566570    -1.364380
 O    -1.052650     2.603670    -0.083381
 O    -1.625800     1.025080     2.237760
 O    -2.493200    -0.979621     0.836703
 O    -1.317520    -1.967960    -1.360820
 O     0.112531     1.537500    -2.255040
 O     1.519780     2.156940     1.329210
 O    -0.123097    -1.242460     2.130480
 O     2.409740     1.006460    -0.921400
 O     2.319550    -0.403128     1.369670
 O     1.117280    -2.454970     0.102579
 H    -3.814180    -1.422170    -1.279160
 H    -2.039300     2.872850    -2.403280
 H    -2.343380    -1.161160     3.381390
 O     0.651045    -3.589060    -2.333490
 H     3.964940     1.493590     1.025810
 H     1.955640    -2.639470     2.509050
 O     1.187960    -0.919301    -2.332620
 H     2.303700     1.083120    -3.455630
 O    -0.697637     2.031250     3.102010
